# Supplementary material for: Astragalus Polysaccharide Improves Insulin Sensitivity via AMPK Activation in 3T3-L1 Adipocytes
Source: MDPI journal article supplement (doi:10.3390/molecules23102711), 2018-10-21
Supplement: s1 [file s1]

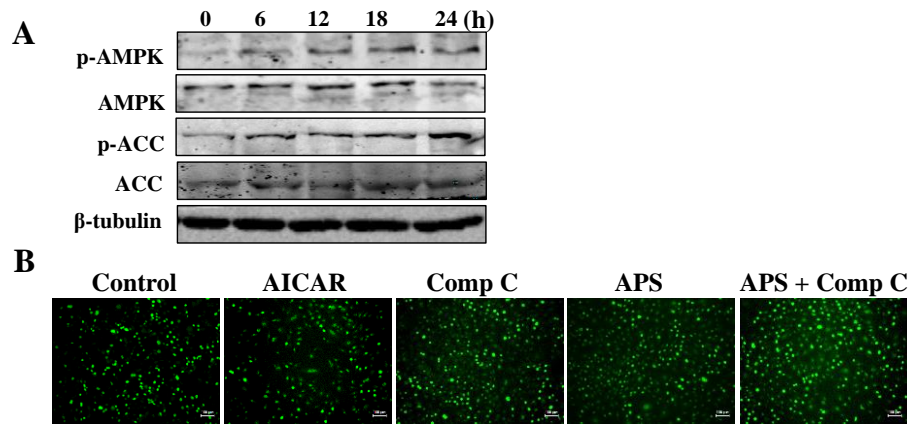

**Supplementary Figure:** APS activates AMPK and promotes 3T3-L1 proliferation. (A) AMPK activity at different time points (0, 6, 12, 18, 24 h). (B) EdU staining after cells were treated with AICAR, Compound C, APS, and APS + Compound C. Scar bar stands for 100  $\mu$ m.
